# Supplementary material for: A highly sensitive turn-on ratiometric luminescent probe based on postsynthetic modification of Tb3+@Cu-MOF for H2S detection
Source: Royal Society of Chemistry journal article supplement (doi:10.1039/c7tc02430d), 2017-01-01
Supplement: c7tc02430d1.pdf [file c7tc02430d1.pdf]

## Electronic Supplementary Information

### Highly sensitive turn-on ratiometric luminescent probe based on postsynthetic modification $\text{Tb}^{3+}$ @Cu-MOF for $\text{H}_2\text{S}$ detection

Xubin Zheng,<sup>a</sup> Ruiqing Fan,<sup>\*a</sup> Yang Song,<sup>a</sup> Ani Wang,<sup>a</sup> Kai Xing,<sup>a</sup> Xi Du,<sup>a</sup> Ping Wang<sup>a</sup> and Yulin Yang<sup>\*a</sup>

<sup>a</sup> MIIT Key Laboratory of Critical Materials Technology for New Energy Conversion and Storage, School of Chemistry and Chemical Engineering, Harbin Institute of Technology, P. R. China \*E-mail: fanruiqing@hit.edu.cn; ylyang@hit.edu.cn

**Table S1.** Selected bond lengths (Å) and bond angles (°) for MOFs **Cu1** and **Cu2**.

| <b>Cu1</b>         |            |                      |            |
|--------------------|------------|----------------------|------------|
| Cu(1)-O(2)         | 1.959(3)   | O(2)-Cu(1)-O(2)#1    | 180.0      |
| Cu(1)-N(1)         | 2.020(3)   | O(2)-Cu(1)-N(1)#1    | 90.89(13)  |
|                    |            | O(2)-Cu(1)-N(1)      | 89.11(13)  |
| <b>Cu2</b>         |            |                      |            |
| Cu(1)-O(2)         | 1.916(4)   | N(1)-Cu(1)-O(9)#2    | 82.33(15)  |
| Cu(1)-N(1)         | 2.154(5)   | O(2)-Cu(1)-O(9)#3    | 88.56(15)  |
| Cu(1)-O(9)#2       | 2.665(5)   | N(1)-Cu(1)-O(9)#3    | 97.67(15)  |
| Cu(2)-O(10)        | 1.886(4)   | O(9)#2-Cu(1)-O(9)#3  | 180.0      |
| Cu(2)-O(8)         | 1.940(4)   | O(10)-Cu(2)-O(8)     | 95.14(17)  |
| Cu(2)-O(6)#4       | 1.994(4)   | O(10)-Cu(2)-O(6)#4   | 91.28(16)  |
| Cu(2)-N(2)         | 2.002(5)   | O(8)-Cu(2)-O(6)#4    | 173.27(16) |
| Cu(2)-O(3)#5       | 2.445(4)   | O(10)-Cu(2)-N(2)     | 171.73(19) |
| Cu(3)-O(10)#7      | 1.893(4)   | O(8)-Cu(2)-N(2)      | 87.28(18)  |
| Cu(3)-O(9)         | 1.959(4)   | O(6)#4-Cu(2)-N(2)    | 86.08(17)  |
| Cu(3)-O(5)#8       | 1.973(4)   | O(10)-Cu(2)-O(3)#5   | 98.56(16)  |
| Cu(3)-O(4)         | 1.979(4)   | O(4)-Cu(3)-O(4)#9    | 82.72(17)  |
| Cu(3)-O(4)#9       | 2.584(5)   | O(8)-Cu(2)-O(3)#5    | 93.04(18)  |
|                    |            | O(6)#4-Cu(2)-O(3)#5  | 87.98(16)  |
| O(2)-Cu(1)-O(2)#1  | 180.000(1) | N(2)-Cu(2)-O(3)#5    | 89.19(17)  |
| O(2)-Cu(1)-N(1)    | 88.16(16)  | O(10)#7-Cu(3)-O(9)   | 155.2(2)   |
| O(2)#1-Cu(1)-N(1)  | 91.84(16)  | O(10)#7-Cu(3)-O(5)#8 | 96.98(17)  |
| N(1)#1-Cu(1)-N(1)  | 179.999(2) | O(9)-Cu(3)-O(5)#8    | 88.76(16)  |
| O(10)#7-Cu(3)-O(4) | 85.80(17)  | O(10)#7-Cu(3)-O(4)#9 | 105.18(16) |
| O(9)-Cu(3)-O(4)    | 93.04(17)  | O(9)-Cu(3)-O(4)#9    | 99.24(17)  |
| O(5)#8-Cu(3)-O(4)  | 169.24(19) | O(5)#8-Cu(3)-O(4)#9  | 86.52(15)  |
| O(2)-Cu(1)-O(9)#2  | 91.44(15)  |                      |            |

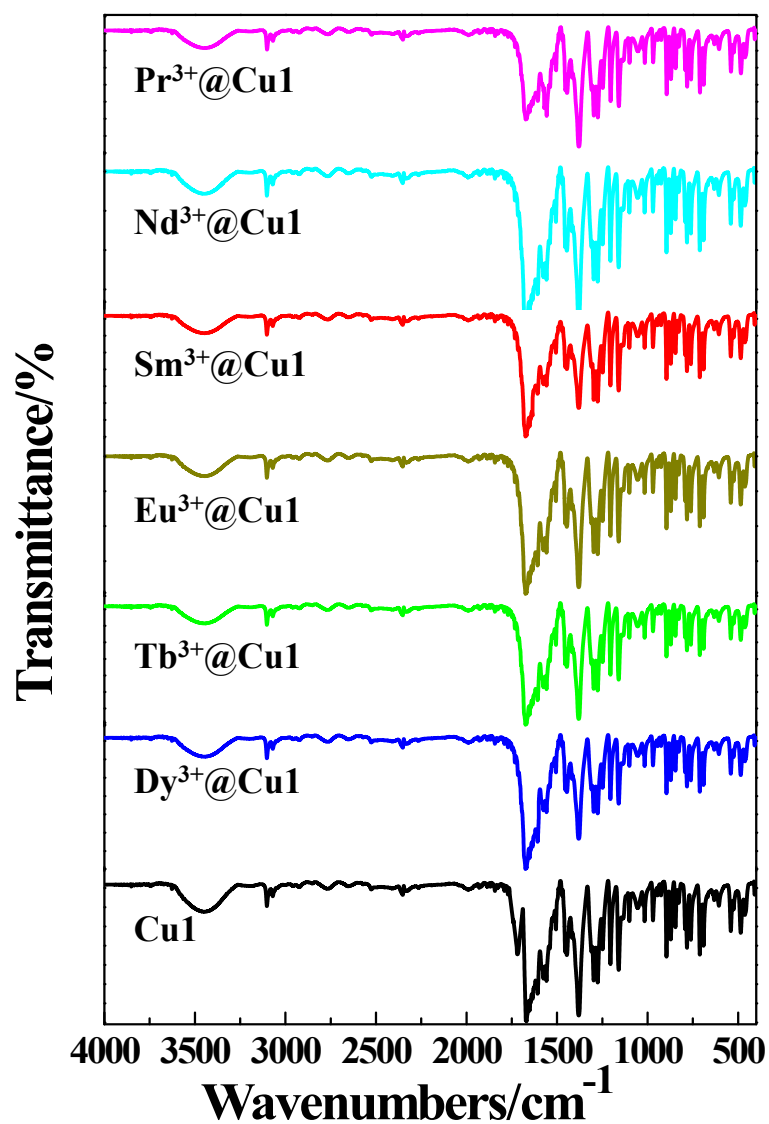

**Fig. S1** The IR spectra of  $\text{Ln}^{3+}@\text{Cu1}$  ( $\text{Ln}^{3+} = \text{Pr}^{3+}, \text{Nd}^{3+}, \text{Sm}^{3+}, \text{Eu}^{3+}, \text{Tb}^{3+}$  and  $\text{Dy}^{3+}$ ) and  $\text{Cu1}$ .

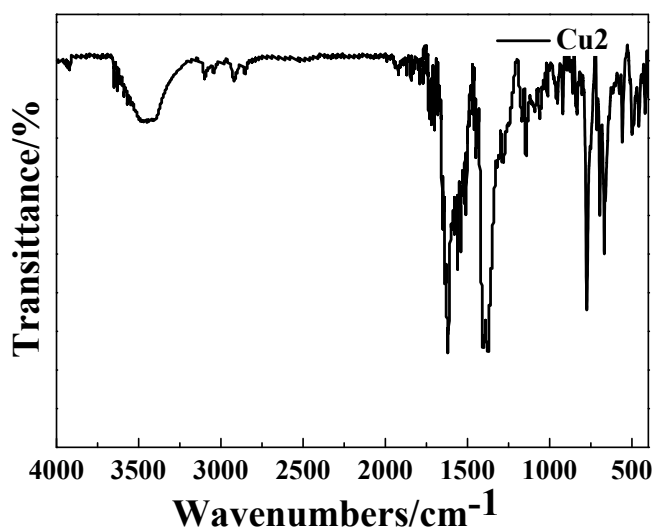

**Fig. S2** The IR spectra of  $\text{Cu2}$ .

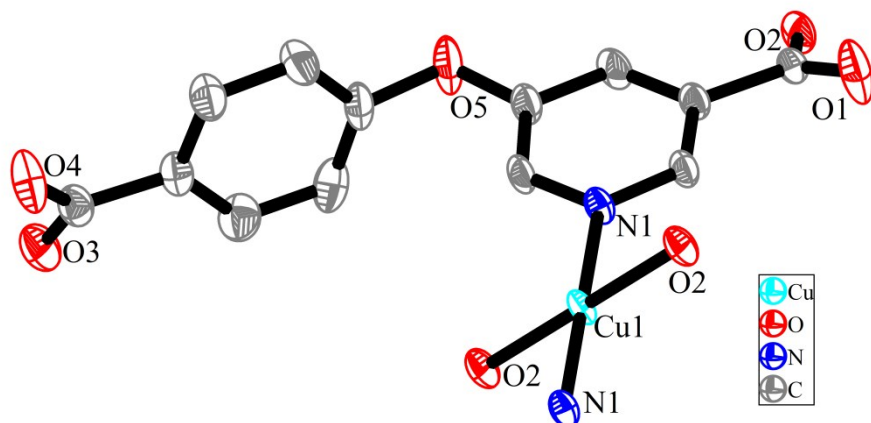

**Fig. S3** The structural unit of **Cu1** with labeling scheme and 50% thermal ellipsoids (hydrogen atoms are omitted for clarity).

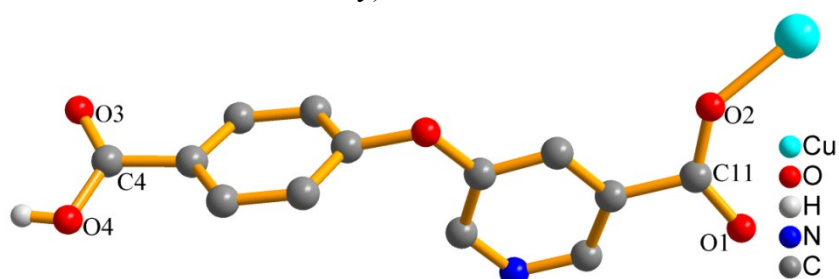

**Fig. S4** Carboxyl coordination modes of **Cu1**.

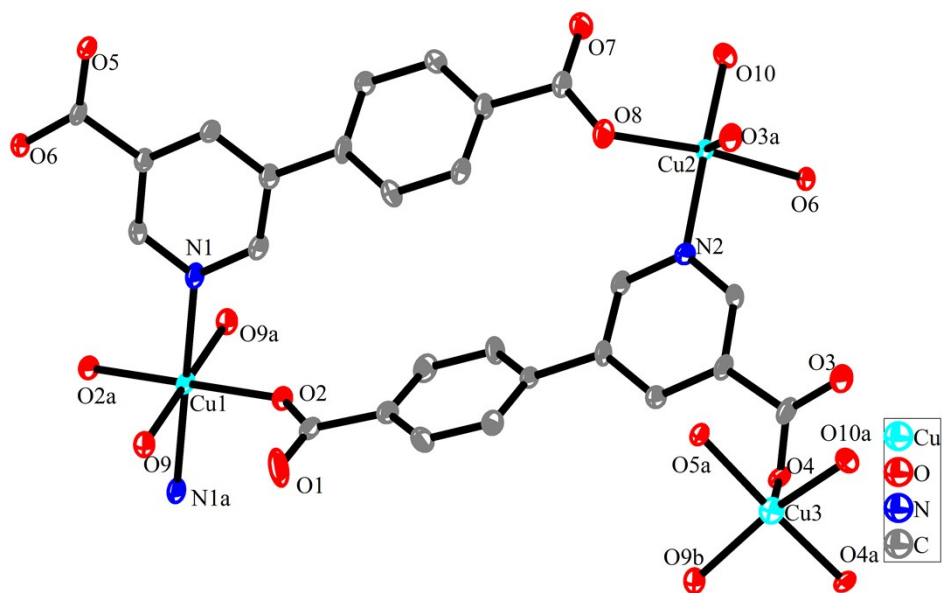

**Fig. S5** The structural unit of **Cu2** with labeling scheme and 50% thermal ellipsoids (hydrogen atoms are omitted for clarity).

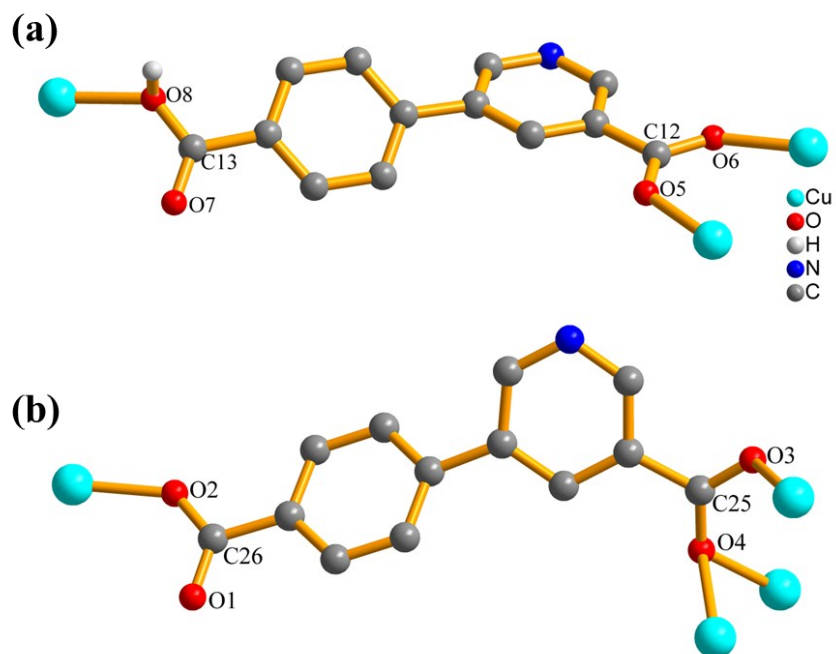

**Fig. S6** Carboxyl coordination modes of **Cu2** (a) HCPC<sup>-</sup>; (b) CPC<sup>2-</sup>.

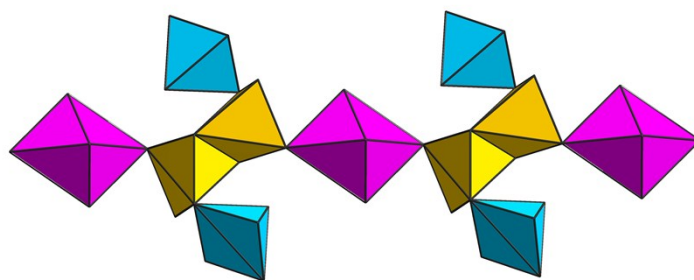

**Fig. S7** Cu-O chain in **Cu2**

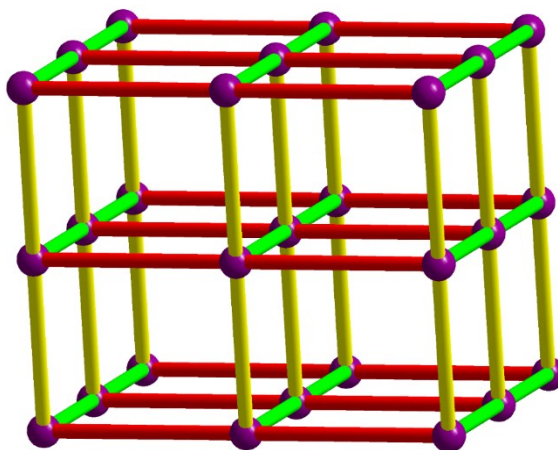

**Fig. S8** Topological representation of 3D structure of **Cu2**.

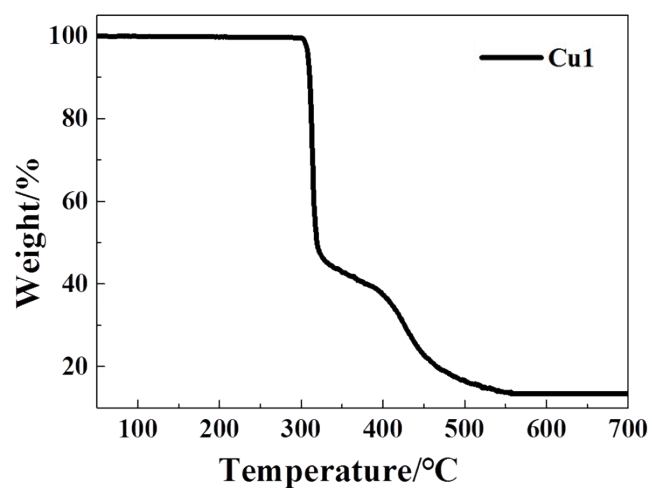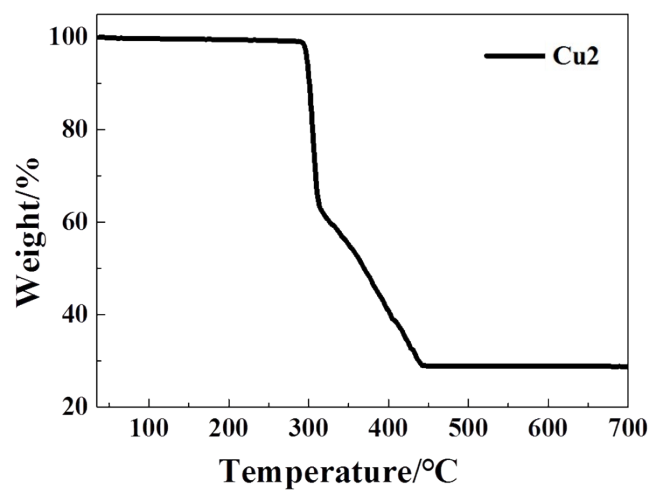

Fig. S9 Thermal gravimetric curves for Cu1 and Cu2.

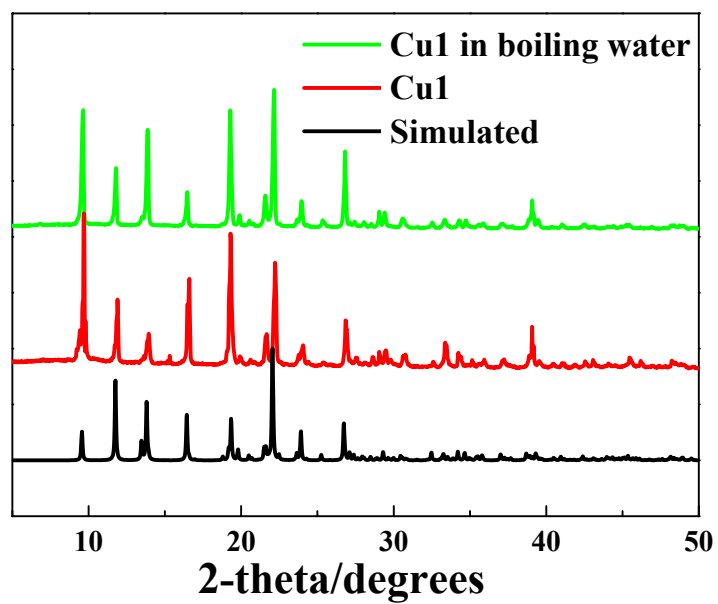

Fig. S10 PXR D patterns of Cu1 with the relevant simulated pattern.

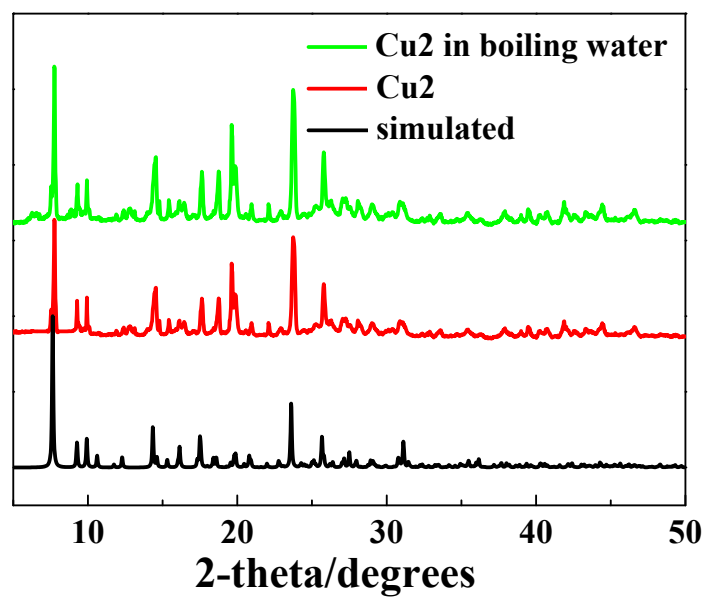

**Fig. S11** PXRD patterns of **Cu2** with the relevant simulated pattern.

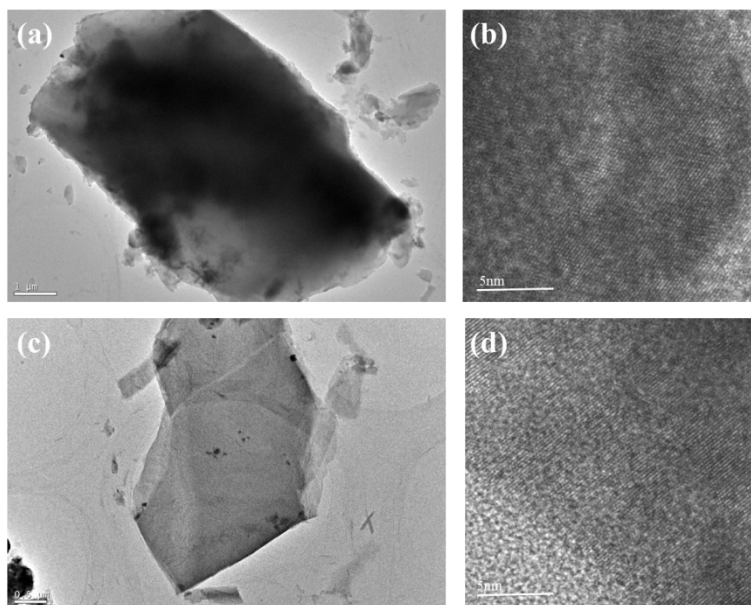

**Fig. S12** TEM and HRTEM images of **Cu1** (a and b) and **Cu2** (c and d).

**Table S2.** Selected luminescent materials of Cu(II)-complexes.

| No. | References                                | Complexes                                                                                                | Excitation( $\lambda_{ex}$ ) | Emission( $\lambda_{em}$ ) |
|-----|-------------------------------------------|----------------------------------------------------------------------------------------------------------|------------------------------|----------------------------|
| 1   | <i>ChemPlusChem</i> 2016, 81, 857.        | $[\text{Cu}_3(2\text{-eiba})_4(\text{NO}_3)_2] \cdot 5\text{DMF}$                                        | 370nm                        | 445nm                      |
| 2   | <i>Cryst. Growth Des.</i> 2012, 12, 3786. | Cu-CPPs (CPP-1b)                                                                                         | 358nm                        | 396nm                      |
| 3   | <i>Cryst. Growth Des.</i> 2012, 12, 5025. | $\{[\text{Cu}(\text{azim})_2(\text{DMF})_2] \cdot (\text{ClO}_4)_2 \cdot 2\text{DMF}\}_n$ (1)            | 304nm                        | 417nm                      |
|     |                                           | $\{[\text{Cu}(\text{azim})(\text{Cl})]\}_n$ (2)                                                          | 304nm                        | 426nm                      |
| 4   | <i>Cryst. Growth Des.</i> 2013, 13, 3561. | $[\text{Cu}(3\text{-dppa})(1,3,5\text{-HBTC})]$ (1)                                                      | 320nm                        | 399nm                      |
|     |                                           | $[\text{Cu}(3\text{-dpha})(1,3,5\text{-HBTC})(\text{H}_2\text{O})] \cdot \text{H}_2\text{O}$ (2)         | 320nm                        | 400nm                      |
|     |                                           | $[\text{Cu}_3(3\text{-dpsea})(1,3,5\text{-BTC})_2(\text{H}_2\text{O})_5] \cdot 4\text{H}_2\text{O}$ (3)  | 320nm                        | 400nm                      |
|     |                                           | $[\text{Cu}(3\text{-dpba})(1,2\text{-BDC})] \cdot \text{H}_2\text{O}$ (4)                                | 320nm                        | 399nm                      |
|     |                                           | $[\text{Cu}(3\text{-dpha})(1,2\text{-BDC})]$ (5)                                                         | 320nm                        | 404nm                      |
|     |                                           | $[\text{Cu}(3\text{-dpsea})(1,2\text{-BDC})]\text{H}_2\text{O}$ (6)                                      | 320nm                        | 396nm                      |
|     |                                           | $[\text{Cu}_2(3\text{-dpyp})(1,3\text{-BDC})_2(\text{H}_2\text{O})_4] \cdot 3\text{H}_2\text{O}$ (7)     | 320nm                        | 420nm                      |
|     |                                           | $[\text{Cu}(3\text{-dppa})(1,3\text{-BDC})(\text{H}_2\text{O})] \cdot 2\text{H}_2\text{O}$ (8)           | 320nm                        | 399nm                      |
|     |                                           | $[\text{Cu}(3\text{-dppia})(1,3\text{-BDC})(\text{H}_2\text{O})_2] \cdot 2\text{H}_2\text{O}$ (9)        | 320nm                        | 398nm                      |
|     |                                           | $[\text{Cu}_2(3\text{-dpsea})_2(1,3\text{-BDC})_2(\text{H}_2\text{O})_2] \cdot 7\text{H}_2\text{O}$ (10) | 320nm                        | 396nm                      |
|     |                                           | $[\text{Cu}(3\text{-dpba})(1,4\text{-NDC})] \cdot 3\text{H}_2\text{O}$ (11)                              | 320nm                        | 399nm                      |
|     |                                           | $[\text{Cu}(3\text{-dpyh})(1,4\text{-NDC})(\text{H}_2\text{O})] \cdot 3\text{H}_2\text{O}$ (12)          | 320nm                        | 397nm                      |



|    |                                               |                                                                                                                                                                                                                                                                                                                                                                                                                                                                                                     |                                                             |                                                             |
|----|-----------------------------------------------|-----------------------------------------------------------------------------------------------------------------------------------------------------------------------------------------------------------------------------------------------------------------------------------------------------------------------------------------------------------------------------------------------------------------------------------------------------------------------------------------------------|-------------------------------------------------------------|-------------------------------------------------------------|
|    |                                               | [Cu(3-dpyh) <sub>0.5</sub> (1,4-NDC)]·H <sub>2</sub> O<br>(13)                                                                                                                                                                                                                                                                                                                                                                                                                                      | 320nm                                                       | 384nm                                                       |
| 5  | <i>Cryst. Growth Des.</i><br>2013, 13, 5050.  | [CuL(bbm)]·0.5H <sub>2</sub> O (1)<br>[CuL(4,4'-bpy) <sub>0.5</sub> ] (2)                                                                                                                                                                                                                                                                                                                                                                                                                           | --<br>280nm                                                 | --<br>397nm                                                 |
| 6  | <i>CrystEngComm</i> ,<br>2016, 18, 54.        | [Cu <sub>2</sub> (μ <sub>2</sub> -<br>L) <sub>2</sub> ( <sup>2,2'</sup> BPy) <sub>2</sub> (H <sub>2</sub> O) <sub>2</sub> ](NO <sub>3</sub> ) <sub>2</sub> ·S<br>(1)<br>[Cu <sub>2</sub> (μ <sub>2</sub> -<br>L) <sub>2</sub> ( <sup>2,2'</sup> BPy) <sub>2</sub> (NO <sub>3</sub> ) <sub>2</sub> ]·MeOH (2)<br>[Cu(L)( <sup>2,2'</sup> BPy) <sub>2</sub> ]NO <sub>3</sub> (H <sub>2</sub> O) <sub>2</sub> (3)                                                                                      | 215nm<br>215nm<br>215nm                                     | 516nm<br>482nm<br>492nm                                     |
| 7  | <i>Dalton Trans.</i> , 2013,<br>42, 8375.     | [Cu(3-dpye)(3-<br>NPA)(H <sub>2</sub> O)]·3H <sub>2</sub> O (1)<br>[Cu(3-dpye) <sub>0.5</sub> (5-AIP)(H <sub>2</sub> O)](2)<br>[Cu(3-dpye)(1,3-BDC)]3H <sub>2</sub> O(3)<br>[Cu <sub>3</sub> (3-dpye)(1,2-BDC) <sub>2</sub> (μ <sub>2</sub> -<br>OH) <sub>2</sub> ] (4)<br>[Cu <sub>3</sub> (3-dpyb)(1,2-BDC) <sub>2</sub> (μ <sub>2</sub> -<br>OH) <sub>2</sub> ] (5)<br>[Cu(3-dpyh) <sub>0.5</sub> (1,2-BDC)]·H <sub>2</sub> O<br>(6)<br>[Cu(3-dpyh) <sub>0.5</sub> (5-AIP)(H <sub>2</sub> O)](7) | 320nm<br>320nm<br>320nm<br>310nm<br>320nm<br>320nm<br>320nm | 400nm<br>382nm<br>413nm<br>400nm<br>400nm<br>398nm<br>396nm |
| 8  | <i>Dalton Trans.</i> , 2013,<br>42, 5902.     | {[Cu(bibim-4) <sub>2</sub> (NO <sub>3</sub> )](NO <sub>3</sub> )} <sub>n</sub>                                                                                                                                                                                                                                                                                                                                                                                                                      | 240nm                                                       | 305nm                                                       |
| 9  | <i>Inorg. Chem.</i> 2016,<br>55, 75.          | [(CH <sub>3</sub> ) <sub>2</sub> NH <sub>2</sub> ]·[Cu <sub>2</sub> (CN) <sub>3</sub> ] (1)<br>[(CH <sub>3</sub> ) <sub>2</sub> NH <sub>2</sub> ]·[Cu <sub>3</sub> (CN) <sub>4</sub> ] (2).                                                                                                                                                                                                                                                                                                         | 277nm<br>--                                                 | 540nm<br>--                                                 |
| 10 | <i>Inorg. Chem. Front.</i> ,<br>2015, 2, 373. | [Cu(3-DPNA)(1,3,5-<br>HBTC)]·H <sub>2</sub> O (1)<br>[Cu(4-DPNA)(1,3,5-BTC) <sub>2/3</sub> ](2)                                                                                                                                                                                                                                                                                                                                                                                                     | 320nm<br>320nm                                              | 465nm<br>411nm                                              |

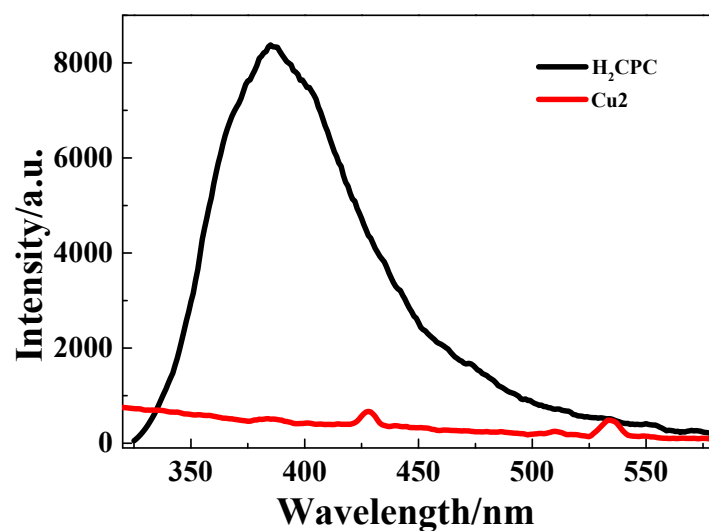

Fig. S13 Luminescence of H<sub>2</sub>CPC and Cu<sub>2</sub> in aqueous solution.

**Table S3.** The ICP results of Ln<sup>3+</sup>@Cu1 and Ln<sup>3+</sup>@Cu2 (Ln<sup>3+</sup> = Pr<sup>3+</sup>, Nd<sup>3+</sup>, Sm<sup>3+</sup>, Eu<sup>3+</sup>, Tb<sup>3+</sup> and Dy<sup>3+</sup>).

| Samples               | Cu <sup>2+</sup> (wt%) | Ln <sup>3+</sup> (wt%) |
|-----------------------|------------------------|------------------------|
| Cu1                   | 10.95                  | ---                    |
| Pr <sup>3+</sup> @Cu1 | 9.42                   | 13.84                  |
| Nd <sup>3+</sup> @Cu1 | 9.39                   | 14.12                  |
| Sm <sup>3+</sup> @Cu1 | 9.34                   | 14.64                  |
| Eu <sup>3+</sup> @Cu1 | 9.32                   | 14.77                  |
| Tb <sup>3+</sup> @Cu1 | 9.26                   | 15.34                  |
| Dy <sup>3+</sup> @Cu1 | 9.23                   | 15.64                  |
| Cu2                   | 23.47                  | ---                    |
| Pr <sup>3+</sup> @Cu2 | 23.45                  | 0.03                   |
| Nd <sup>3+</sup> @Cu2 | 23.46                  | 0.05                   |
| Sm <sup>3+</sup> @Cu2 | 23.47                  | 0.01                   |
| Eu <sup>3+</sup> @Cu2 | 23.45                  | 0.04                   |
| Tb <sup>3+</sup> @Cu2 | 23.48                  | 0.03                   |
| Dy <sup>3+</sup> @Cu2 | 23.47                  | 0.02                   |

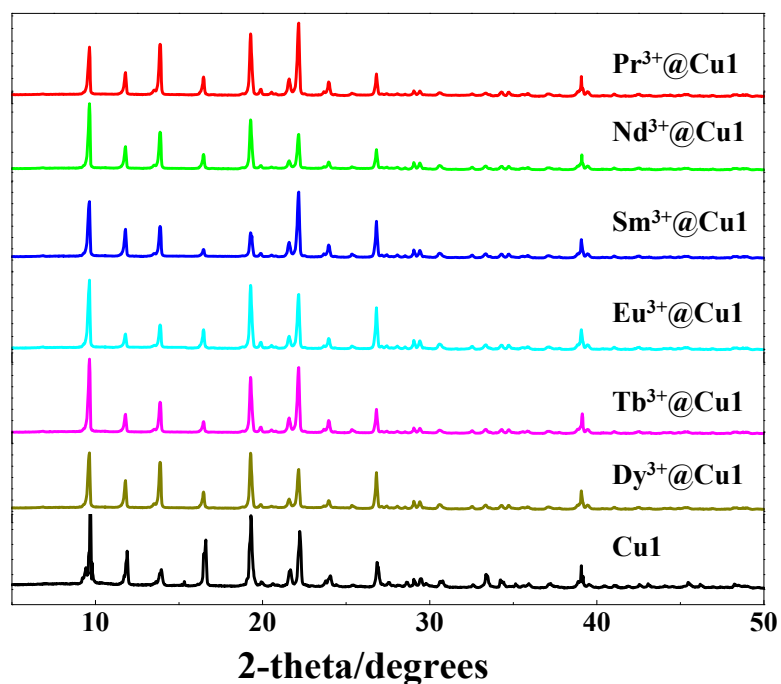

**Fig. S14** PXRD patterns of  $\text{Ln}^{3+}@\text{Cu1}$  ( $\text{Ln}^{3+} = \text{Pr}^{3+}, \text{Nd}^{3+}, \text{Sm}^{3+}, \text{Eu}^{3+}, \text{Tb}^{3+}$  and  $\text{Dy}^{3+}$ ) and **Cu1**.

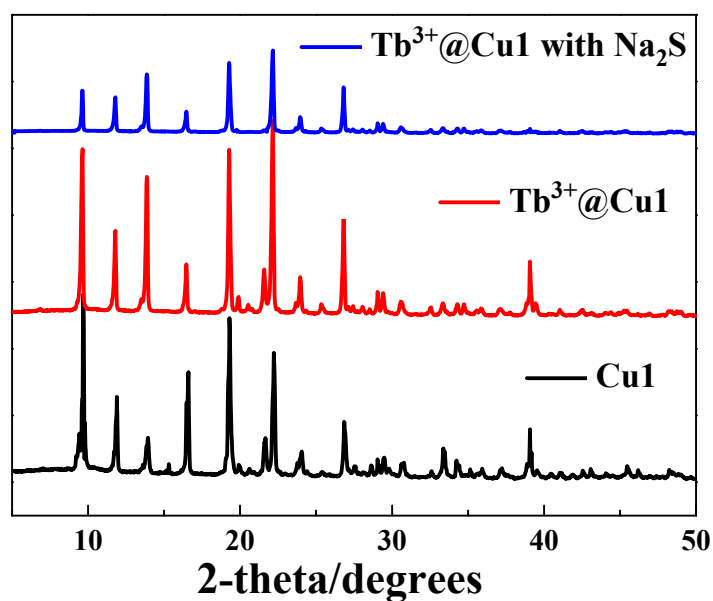

**Fig. S15** PXRD patterns of  $\text{Tb}^{3+}@\text{Cu1}$  after the inclusion of  $\text{Na}_2\text{S}$ .

**Table S4.** The lifetime of MOFs **Cu1**,  $\text{H}_2\text{CPOC}$ ,  $\text{H}_2\text{CPC}$  and  $\text{Tb}^{3+}@\text{Cu1}$

| Complex                     | $\tau_1$ ( $\mu\text{s}$ ) | $A_1$ (%) | $\tau_2$ ( $\mu\text{s}$ ) | $A_2$ (%) | $\chi^2$ | $\tau$ ( $\mu\text{s}$ ) |
|-----------------------------|----------------------------|-----------|----------------------------|-----------|----------|--------------------------|
| Cu1                         | 0.82                       | 80.13     | 6.50                       | 19.87     | 1.066    | 4.58                     |
| $\text{H}_2\text{CPOC}$     | 1.50                       | 60.36     | 7.52                       | 39.64     | 1.105    | 6.12                     |
| $\text{H}_2\text{CPC}$      | 0.55                       | 39.56     | 6.31                       | 60.44     | 1.021    | 6.00                     |
| $\text{Tb}^{3+}@\text{Cu1}$ | 259.10                     | 100       | --                         | --        | 1.143    | 259.10                   |

|                                              |        |     |    |    |       |        |
|----------------------------------------------|--------|-----|----|----|-------|--------|
| Tb <sup>3+</sup> @Cu1 with Na <sub>2</sub> S | 755.41 | 100 | -- | -- | 1.002 | 755.41 |
|----------------------------------------------|--------|-----|----|----|-------|--------|

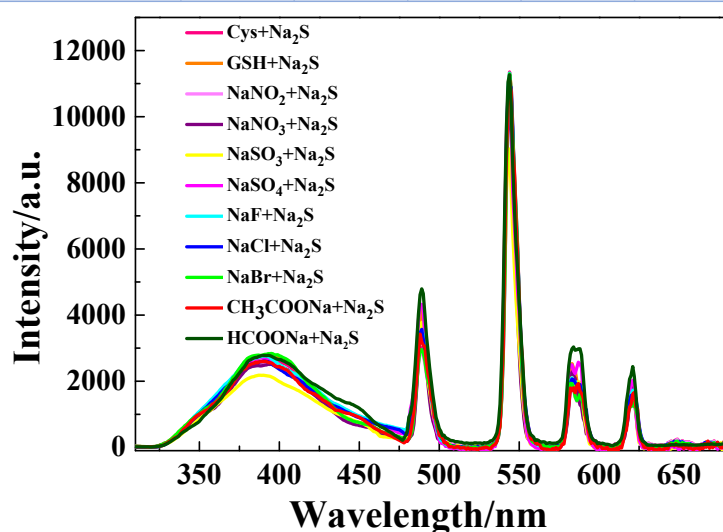

Fig. S16 Luminescence intensity of Tb<sup>3+</sup>@Cu1 with the interfering chemical species.

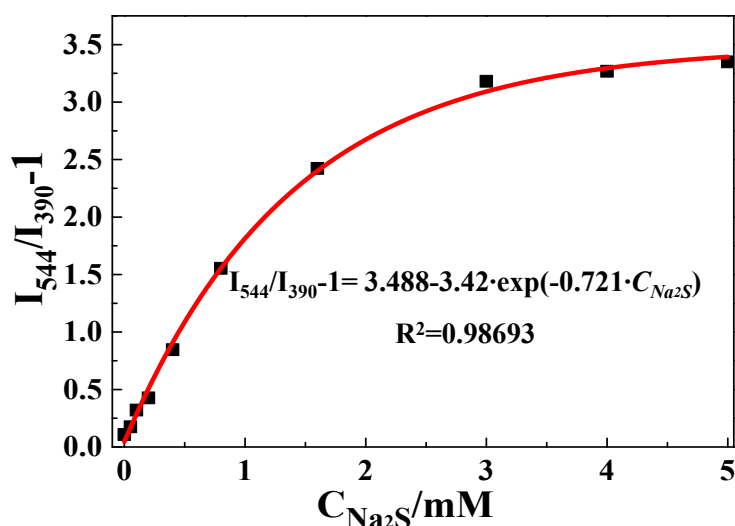

Fig. S17 Fitting curve between luminescence intensity ratio ( $I_{544}/I_{390}-1$ ) and the concentrations (0-5 mM) of Na<sub>2</sub>S.

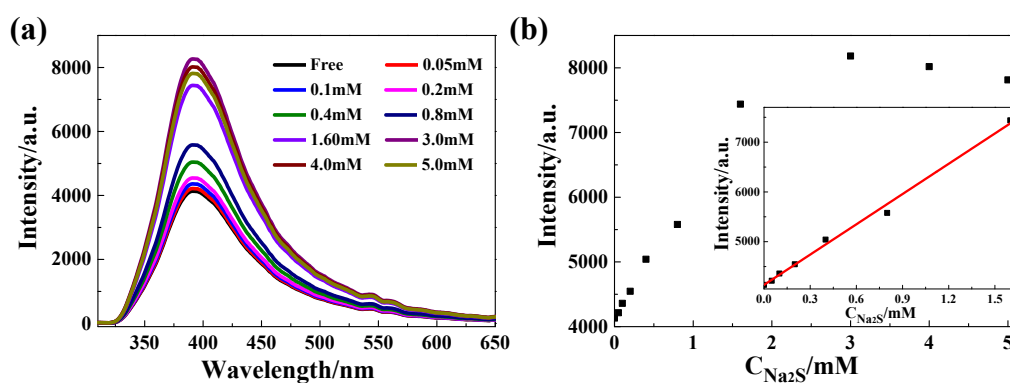

Fig. S18 (a) Luminescence spectra of Cu1 with increasing concentrations (0-5 mM) of Na<sub>2</sub>S; (b) Concentration dependence of the luminescence intensity  $I_{390}$  (0-5 mM) and Fitting curve between luminescence intensity  $I_{390}$  and the concentrations (0-1.6 mM) of Na<sub>2</sub>S (insert).

**Table S5.** Standard deviation calculation and detection limit calculation.

| No.                             | Luminescence intensity ( $I_{544}$ ) of $Tb^{3+}@Cu1$ | Luminescence intensity ( $I_{390}$ ) of $Tb^{3+}@Cu1$ | $I_{544}/I_{390}-1$ | Luminescence intensity ( $I_{390}$ ) of $Cu1$ |
|---------------------------------|-------------------------------------------------------|-------------------------------------------------------|---------------------|-----------------------------------------------|
| 1                               | 2855.62 a.u.                                          | 3146.34 a.u.                                          | 0.101806            | 4129.21 a.u.                                  |
| 2                               | 2840.23 a.u.                                          | 3125.89 a.u.                                          | 0.100576            | 4122.26 a.u.                                  |
| 3                               | 2847.66 a.u.                                          | 3137.78 a.u.                                          | 0.101880            | 4139.02 a.u.                                  |
| 4                               | 2839.77 a.u.                                          | 3128.23 a.u.                                          | 0.101579            | 4118.25 a.u.                                  |
| 5                               | 2852.39 a.u.                                          | 3143.56 a.u.                                          | 0.102079            | 4136.53 a.u.                                  |
| Standard Deviation ( $\sigma$ ) | --                                                    | --                                                    | 0.000591            | 8.92                                          |
| Slope ( $S$ )                   | --                                                    | --                                                    | 1.479 $mM^{-1}$     | 2018.59 $mM^{-1}$                             |
| Detection limit ( $3\sigma/S$ ) | --                                                    | --                                                    | 1.20 $\mu M$        | 13.25 $\mu M$                                 |

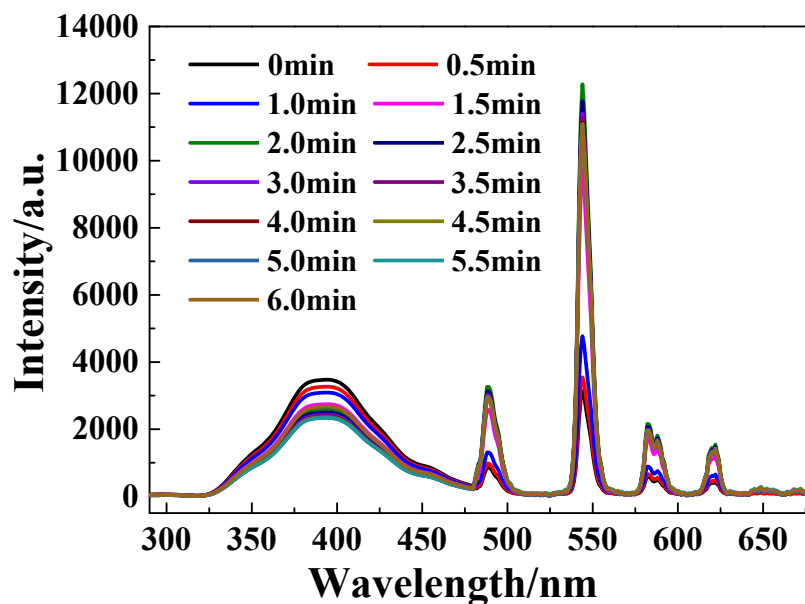

**Fig. S19** Luminescence intensity of  $Tb^{3+}@Cu1$  towards addition of  $Na_2S$  (5 mM) after 0-6 min.

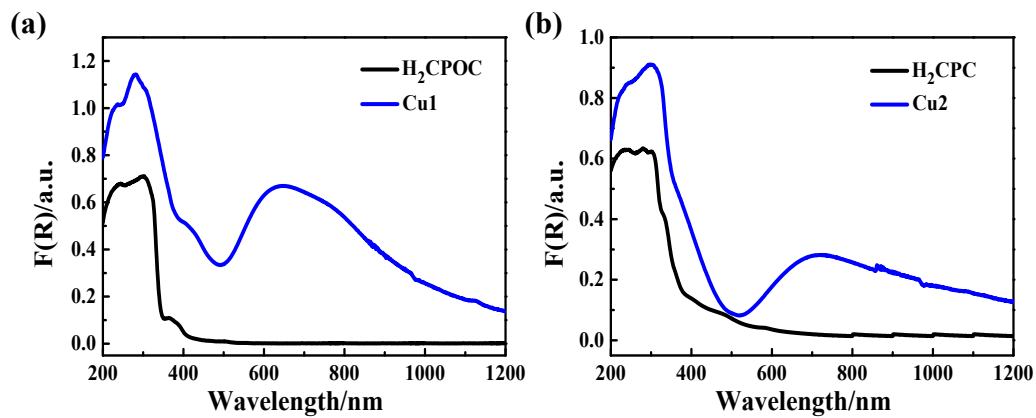

**Fig. S20** Plots of the UV-vis absorption spectra of (a) H<sub>2</sub>CPOC and **Cu1**; (b) H<sub>2</sub>CPC and **Cu2** at room temperature.

**Table S6.** Selected luminescent materials for sensing H<sub>2</sub>S.

| No. | probes                    | solution     | response time | detection limit       | references                                 |
|-----|---------------------------|--------------|---------------|-----------------------|--------------------------------------------|
| 1   | SFP-1                     | Live cells   | 60 min        | 5-10 $\mu$ M          | <i>Nat. Commun.</i> 2011, 2, 495           |
|     | SFP-2                     |              | 60 min        | 5-10 $\mu$ M          |                                            |
| 2   | cpGFP-<br>Tyr66pAzF       | Live cells   | 15 min        | 10 $\mu$ M            | <i>J. Am. Chem.Soc.</i> 2012, 134, 9589    |
| 3   | FSI                       | Live cells   | 120 min       | 5-10 $\mu$ M          | <i>Chem. Commun.</i> 2012, 48, 8395.       |
| 4   | Sensor 4                  | Live cells   | 30 min        | 10 $\mu$ M            | <i>Biomaterials</i> , 2013, 34, 7429.      |
| 5   | CLSS-2                    | PIPES buffer | 60 min        | 4.6 $\pm$ 2.0 $\mu$ M | <i>J. Am. Chem. Soc.</i> 2013, 135, 16697. |
| 6   | AMP/Tb/Ag                 | HEPES buffer | 2 min         | 0.8 $\mu$ M           | <i>Anal. Chem.</i> 2013, 85, 11020.        |
| 7   | Zr-UiO-66-N <sub>3</sub>  | Live cells   | 3 min         | 118 $\mu$ M           | <i>Sci. Rep.</i> 2014, 4, 7053.            |
| 8   | Zr-UiO-66-NO <sub>2</sub> | HEPES buffer | 7.7 min       | 188 $\mu$ M           | <i>Chem. Eur. J.</i> 2015, 21, 9994.       |
| 9   | IRMOF-3-N3                | HEPES buffer | 2 min         | 28.3 $\mu$ M          | <i>Appl. Surf. Sci.</i> 2015, 355, 814     |
| 10  | Ce-UiO-66-N <sub>3</sub>  | HEPES buffer | 12.7 min      | 12.2 $\mu$ M          | <i>CrystEngComm</i> , 2016, 18, 4374.      |
|     | Ce-UiO-66-NO <sub>2</sub> |              | 12.7 min      | 34.84 $\mu$ M         |                                            |
| 11  | GMP/Tb/OX-Cu              | HEPES buffer | 3 min         | 0.5 $\mu$ M           | <i>Anal. Methods</i> , 2017, 9, 1004.      |
| 12  | Cu1                       | HEPES buffer | --            | 13.25 $\mu$ M         | This work                                  |
|     | Tb <sup>3+</sup> @Cu1     |              | < 2 min       | 1.20 $\mu$ M          |                                            |
